# Supplementary material for: TALKIEN: crossTALK IntEraction Network. A web-based tool for deciphering molecular communication through ligand–receptor interactions
Source: Royal Society of Chemistry journal article supplement (doi:10.1039/d3mo00049d), 2023-07-05
Supplement: d3mo00049d2.xlsx [file d3mo00049d2.xlsx]

## Sheet: LR_consensus
gene_symbol	CellChat	CellPhoneDB	iCellNet	Ramilowski	Consensus
A2M	NA	NA	NA	Ligand	Ligand
ABCA1	NA	NA	NA	Receptor	Receptor
ACKR1	Receptor	Receptor	Receptor	NA	Receptor
ACKR2	Receptor	Receptor	Receptor	Receptor	Receptor
ACKR3	Receptor	NA	Receptor	Receptor	Receptor
ACKR4	Receptor	Receptor	Receptor	Receptor	Receptor
ACVR1	Receptor	NA	Receptor	Receptor	Receptor
ACVR1B	Receptor	NA	Receptor	Receptor	Receptor
ACVR1C	Receptor	NA	Receptor	Receptor	Receptor
ACVR2A	Receptor	Receptor	Receptor	Receptor	Receptor
ACVR2B	Receptor	Receptor	Receptor	Receptor	Receptor
ACVRL1	Receptor	NA	Receptor	Receptor	Receptor
ADAM10	NA	NA	NA	Receptor	Receptor
ADAM15	NA	NA	NA	Receptor	Receptor
ADAM17	NA	NA	NA	Receptor	Receptor
ADAM2	NA	NA	NA	Receptor	Receptor
ADCY1	NA	NA	NA	Receptor	Receptor
ADCY7	NA	NA	NA	Receptor	Receptor
ADCY8	NA	NA	NA	Receptor	Receptor
ADCY9	NA	NA	NA	Receptor	Receptor
ADCYAP1	Ligand	NA	NA	Ligand	Ligand
ADCYAP1R1	Receptor	NA	NA	Receptor	Receptor
ADIPOQ	Ligand	NA	NA	Ligand	Ligand
ADIPOR1	Receptor	NA	NA	NA	Receptor
ADIPOR2	Receptor	NA	NA	NA	Receptor
ADM	Ligand	NA	NA	Ligand	Ligand
ADM2	NA	NA	NA	Ligand	Ligand
ADORA1	Receptor	Receptor	NA	Receptor	Receptor
ADORA2A	Receptor	Receptor	NA	NA	Receptor
ADORA2B	Receptor	Receptor	NA	Receptor	Receptor
ADORA3	NA	Receptor	NA	NA	Receptor
ADRA2A	NA	NA	NA	Receptor	Receptor
ADRA2B	NA	NA	NA	Receptor	Receptor
ADRB2	NA	NA	NA	Receptor	Receptor
ADRB3	NA	NA	NA	Receptor	Receptor
AGR2	NA	NA	NA	Ligand	Ligand
AGRN	Ligand	NA	NA	NA	Ligand
AGRP	NA	NA	NA	Ligand	Ligand
AGT	Ligand	NA	NA	Ligand	Ligand
AGTR1	Receptor	NA	NA	Receptor	Receptor
AGTR2	NA	NA	NA	Receptor	Receptor
AHSG	NA	NA	NA	Ligand	Ligand
ALB	NA	Ligand	NA	Ligand	Ligand
ALCAM	NA	Ligand	NA	NA	Ligand
ALK	Receptor	Receptor	NA	Receptor	Receptor
AMELX	NA	NA	NA	Ligand	Ligand
AMH	Ligand	Ligand	Ligand	Ligand	Ligand
AMHR2	Receptor	NA	Receptor	Receptor	Receptor
ANGPT1	Ligand	Ligand	NA	Ligand	Ligand
ANGPT2	Ligand	Ligand	NA	Ligand	Ligand
ANGPT4	NA	Ligand	NA	Ligand	Ligand
ANGPTL1	Ligand	NA	NA	Ligand	Ligand
ANGPTL2	Ligand	NA	NA	Ligand	Ligand
ANGPTL3	Ligand	NA	NA	Ligand	Ligand
ANGPTL4	Ligand	NA	NA	Ligand	Ligand
ANGPTL7	Ligand	NA	NA	NA	Ligand
ANXA1	Ligand	Ligand	NA	NA	Ligand
APCDD1	NA	NA	NA	Receptor	Receptor
APELA	Ligand	NA	NA	NA	Ligand
APLN	Ligand	NA	NA	Ligand	Ligand
APLNR	Receptor	NA	NA	Receptor	Receptor
APLP2	NA	NA	NA	Receptor	Receptor
APOB	NA	NA	NA	Ligand	Ligand
APOC3	NA	NA	NA	Ligand	Ligand
APOD	NA	NA	NA	Ligand	Ligand
APOE	NA	NA	NA	Ligand	Ligand
APP	Ligand	NA	NA	NA	Ligand
AQP1	NA	NA	NA	Receptor	Receptor
AREG	Ligand	Ligand	Ligand	Receptor	Ligand
ART1	NA	NA	NA	Receptor	Receptor
ARTN	Ligand	Ligand	NA	Ligand	Ligand
ASIC3	NA	NA	NA	Receptor	Receptor
ASIP	NA	NA	NA	Ligand	Ligand
ATP1A3	NA	NA	NA	Receptor	Receptor
ATP6AP2	NA	NA	NA	Receptor	Receptor
AVP	Ligand	NA	NA	Ligand	Ligand
AVPR1A	Receptor	NA	NA	Receptor	Receptor
AVPR1B	Receptor	NA	NA	Receptor	Receptor
AVPR2	Receptor	NA	NA	Receptor	Receptor
AXL	Receptor	NA	NA	NA	Receptor
AZGP1	NA	NA	NA	Ligand	Ligand
B2M	NA	NA	NA	Ligand	Ligand
BAG6	Ligand	NA	NA	NA	Ligand
BAMBI	NA	NA	NA	Receptor	Receptor
BCAM	NA	NA	NA	Receptor	Receptor
BCAN	NA	NA	NA	Ligand	Ligand
BDKRB1	Receptor	NA	NA	Receptor	Receptor
BDKRB2	Receptor	NA	NA	Receptor	Receptor
BDNF	Ligand	Ligand	NA	Ligand	Ligand
BGN	NA	NA	NA	Ligand	Ligand
BMP10	Ligand	Ligand	Ligand	Ligand	Ligand
BMP15	Ligand	Ligand	Ligand	Ligand	Ligand
BMP2	Ligand	Ligand	Ligand	Ligand	Ligand
BMP3	NA	Ligand	NA	Ligand	Ligand
BMP4	Ligand	Ligand	Ligand	Ligand	Ligand
BMP5	Ligand	Ligand	Ligand	Ligand	Ligand
BMP6	Ligand	Ligand	Ligand	NA	Ligand
BMP7	Ligand	Ligand	Ligand	Ligand	Ligand
BMP8A	Ligand	Ligand	Ligand	NA	Ligand
BMP8B	Ligand	NA	Ligand	Ligand	Ligand
BMPR1A	Receptor	Receptor	Receptor	Receptor	Receptor
BMPR1B	Receptor	NA	Receptor	Receptor	Receptor
BMPR2	Receptor	NA	Receptor	Receptor	Receptor
BOC	NA	NA	NA	Receptor	Receptor
BRS3	NA	NA	NA	Receptor	Receptor
BST1	NA	NA	NA	Ligand	Ligand
BTC	Ligand	Ligand	NA	NA	Ligand
BTLA	Ligand	NA	Ligand	Receptor	Ligand
C1orf112	NA	NA	NA	Ligand	Ligand
C1QA	NA	NA	NA	Ligand	Ligand
C1QB	NA	NA	NA	Ligand	Ligand
C1QTNF1	NA	NA	NA	Ligand	Ligand
C3	Ligand	Ligand	Ligand	Ligand	Ligand
C3AR1	Receptor	NA	Receptor	Receptor	Receptor
C4A	Ligand	NA	NA	Ligand	Ligand
C4B	NA	NA	NA	Ligand	Ligand
C4BPA	NA	NA	NA	Ligand	Ligand
C5	Ligand	NA	NA	Ligand	Ligand
C5AR1	Receptor	NA	NA	Receptor	Receptor
C5AR2	NA	NA	NA	Receptor	Receptor
C6orf15	NA	NA	NA	Ligand	Ligand
CACHD1	NA	NA	NA	Receptor	Receptor
CACNA1C	NA	NA	NA	Receptor	Receptor
CALCA	Ligand	NA	Ligand	Ligand	Ligand
CALCB	Ligand	NA	NA	Ligand	Ligand
CALCR	Receptor	NA	Receptor	Receptor	Receptor
CALCRL	Receptor	NA	Receptor	Receptor	Receptor
CALR	NA	NA	NA	Ligand	Ligand
CAMP	NA	NA	NA	Ligand	Ligand
CANX	NA	NA	NA	Receptor	Receptor
CAP1	Receptor	NA	NA	NA	Receptor
CATSPER1	NA	NA	NA	Receptor	Receptor
CAV1	NA	NA	NA	Receptor	Receptor
CCK	Ligand	NA	NA	Ligand	Ligand
CCKAR	Receptor	NA	NA	Receptor	Receptor
CCKBR	Receptor	NA	Receptor	Receptor	Receptor
CCL1	Ligand	Ligand	Ligand	Ligand	Ligand
CCL11	Ligand	Ligand	Ligand	Ligand	Ligand
CCL13	Ligand	Ligand	Ligand	Ligand	Ligand
CCL14	Ligand	Ligand	Ligand	Ligand	Ligand
CCL15	Ligand	Ligand	Ligand	Ligand	Ligand
CCL16	Ligand	Ligand	Ligand	Ligand	Ligand
CCL17	Ligand	Ligand	Ligand	Ligand	Ligand
CCL18	Ligand	Ligand	Ligand	Ligand	Ligand
CCL19	Ligand	Ligand	Ligand	Ligand	Ligand
CCL2	Ligand	Ligand	Ligand	Ligand	Ligand
CCL20	Ligand	Ligand	NA	Ligand	Ligand
CCL21	Ligand	Ligand	Ligand	Ligand	Ligand
CCL22	Ligand	Ligand	Ligand	Ligand	Ligand
CCL23	Ligand	Ligand	Ligand	Ligand	Ligand
CCL24	Ligand	Ligand	Ligand	Ligand	Ligand
CCL25	Ligand	Ligand	Ligand	Ligand	Ligand
CCL26	Ligand	Ligand	Ligand	Ligand	Ligand
CCL27	Ligand	Ligand	Ligand	Ligand	Ligand
CCL28	Ligand	NA	Ligand	Ligand	Ligand
CCL3	Ligand	Ligand	Ligand	Ligand	Ligand
CCL4	Ligand	Ligand	Ligand	Ligand	Ligand
CCL4L1	NA	NA	Ligand	NA	Ligand
CCL5	Ligand	Ligand	Ligand	Ligand	Ligand
CCL7	Ligand	Ligand	Ligand	Ligand	Ligand
CCL8	Ligand	Ligand	Ligand	Ligand	Ligand
CCR1	Receptor	Receptor	Receptor	Receptor	Receptor
CCR10	Receptor	Receptor	Receptor	Receptor	Receptor
CCR2	Receptor	Receptor	Receptor	Receptor	Receptor
CCR3	Receptor	Receptor	Receptor	Receptor	Receptor
CCR4	Receptor	Receptor	Receptor	Receptor	Receptor
CCR5	Receptor	Receptor	Receptor	Receptor	Receptor
CCR7	Receptor	Receptor	Receptor	Receptor	Receptor
CCR8	Receptor	Receptor	Receptor	Receptor	Receptor
CCR9	Receptor	Receptor	Receptor	Receptor	Receptor
CCRL2	NA	NA	Receptor	Receptor	Receptor
CD109	NA	NA	NA	Receptor	Receptor
CD14	NA	NA	NA	Ligand	Ligand
CD151	NA	NA	NA	Receptor	Receptor
CD160	NA	Receptor	Ligand	NA	NA
CD177	NA	NA	NA	Receptor	Receptor
CD180	NA	NA	NA	Receptor	Receptor
CD19	NA	NA	NA	Receptor	Receptor
CD1A	NA	NA	NA	Receptor	Receptor
CD1B	NA	NA	NA	Receptor	Receptor
CD1D	Ligand	NA	NA	NA	Ligand
CD2	NA	Receptor	Receptor	NA	Receptor
CD209	NA	NA	Ligand	NA	Ligand
CD22	NA	Receptor	NA	NA	Receptor
CD226	NA	Receptor	Receptor	NA	Receptor
CD24	NA	NA	Ligand	Receptor	NA
CD244	Receptor	Receptor	Receptor	NA	Receptor
CD247	NA	NA	NA	Receptor	Receptor
CD27	Receptor	Receptor	Receptor	Receptor	Receptor
CD274	NA	Receptor	Ligand	NA	NA
CD28	Receptor	NA	Receptor	Receptor	Receptor
CD36	Receptor	NA	NA	Receptor	Receptor
CD38	NA	Receptor	NA	NA	Receptor
CD3D	NA	NA	NA	Receptor	Receptor
CD3G	NA	NA	NA	Receptor	Receptor
CD4	Receptor	NA	Receptor	Receptor	Receptor
CD40	Receptor	NA	Receptor	NA	Receptor
CD40LG	Ligand	Ligand	Ligand	NA	Ligand
CD44	Receptor	Receptor	Receptor	Receptor	Receptor
CD46	Ligand	Receptor	NA	Receptor	Receptor
CD47	Receptor	Receptor	Ligand	Receptor	Receptor
CD48	Ligand	NA	Ligand	Receptor	Ligand
CD5	NA	NA	Receptor	Receptor	Receptor
CD53	NA	NA	NA	Receptor	Receptor
CD55	Receptor	NA	NA	NA	Receptor
CD58	NA	NA	Ligand	NA	Ligand
CD5L	NA	NA	NA	Ligand	Ligand
CD6	NA	Ligand	NA	NA	Ligand
CD63	NA	NA	NA	Receptor	Receptor
CD69	Ligand	NA	Receptor	NA	NA
CD70	Ligand	Ligand	Ligand	NA	Ligand
CD72	Receptor	NA	NA	Receptor	Receptor
CD74	Receptor	Receptor	Receptor	Receptor	Receptor
CD79A	NA	NA	NA	Receptor	Receptor
CD80	Ligand	Receptor	NA	NA	NA
CD81	NA	NA	NA	Receptor	Receptor
CD82	NA	NA	NA	Receptor	Receptor
CD86	Ligand	Receptor	Ligand	NA	Ligand
CD8B	Receptor	NA	NA	NA	Receptor
CD9	NA	NA	Receptor	Receptor	Receptor
CD93	NA	NA	NA	Receptor	Receptor
CD96	NA	Receptor	Receptor	NA	Receptor
CD99L2	Receptor	NA	NA	NA	Receptor
CDH1	NA	NA	Ligand	NA	Ligand
CDH10	NA	NA	NA	Receptor	Receptor
CDH11	Receptor	NA	NA	NA	Receptor
CDH19	NA	NA	NA	Receptor	Receptor
CDH2	NA	NA	NA	Receptor	Receptor
CDH5	NA	NA	NA	Receptor	Receptor
CDH6	NA	NA	NA	Receptor	Receptor
CDH7	NA	NA	NA	Receptor	Receptor
CDON	NA	NA	NA	Receptor	Receptor
CEACAM1	NA	Ligand	Ligand	NA	Ligand
CEACAM5	Receptor	NA	NA	NA	Receptor
CEL	NA	NA	NA	Ligand	Ligand
CELA3B	NA	NA	NA	Ligand	Ligand
CELSR1	NA	NA	NA	Receptor	Receptor
CFC1	Receptor	NA	NA	NA	Receptor
CFH	NA	NA	NA	Ligand	Ligand
CFTR	NA	NA	NA	Receptor	Receptor
CGA	Ligand	NA	NA	Ligand	Ligand
CGN	NA	NA	NA	Ligand	Ligand
CHAD	Ligand	NA	NA	Ligand	Ligand
CHRM1	NA	NA	NA	Receptor	Receptor
CHRM3	NA	NA	NA	Receptor	Receptor
CHRNA1	Receptor	NA	NA	NA	Receptor
CHRNA10	Receptor	NA	NA	NA	Receptor
CHRNA2	Receptor	NA	NA	NA	Receptor
CHRNA3	Receptor	NA	NA	NA	Receptor
CHRNA4	Receptor	NA	NA	Receptor	Receptor
CHRNA5	Receptor	NA	NA	NA	Receptor
CHRNA6	Receptor	NA	NA	NA	Receptor
CHRNA7	Receptor	NA	NA	NA	Receptor
CHRNA9	Receptor	NA	NA	NA	Receptor
CHRNB1	Receptor	NA	NA	NA	Receptor
CHRNB2	Receptor	NA	NA	NA	Receptor
CHRNB3	Receptor	NA	NA	NA	Receptor
CHRNB4	Receptor	NA	NA	NA	Receptor
CHRND	Receptor	NA	NA	NA	Receptor
CHRNE	Receptor	NA	NA	NA	Receptor
CHRNG	Receptor	NA	NA	NA	Receptor
CLCF1	Ligand	Ligand	Ligand	Ligand	Ligand
CLDN2	NA	NA	NA	Receptor	Receptor
CLDN4	NA	NA	NA	Receptor	Receptor
CLEC10A	NA	NA	NA	Ligand	Ligand
CLEC11A	NA	NA	NA	Ligand	Ligand
CLEC1B	Ligand	NA	Ligand	NA	Ligand
CLEC2A	Ligand	Receptor	NA	NA	NA
CLEC2B	Ligand	Receptor	NA	Receptor	Receptor
CLEC2D	Ligand	Receptor	NA	NA	NA
CLEC2L	Ligand	NA	NA	NA	Ligand
CLEC3A	NA	NA	NA	Ligand	Ligand
CLEC4G	NA	NA	Ligand	NA	Ligand
CLEC4M	NA	NA	NA	Ligand	Ligand
CMKLR1	Receptor	NA	NA	Receptor	Receptor
CNR1	NA	NA	NA	Receptor	Receptor
CNTF	Ligand	Ligand	Ligand	Ligand	Ligand
CNTFR	Receptor	NA	Receptor	Receptor	Receptor
CNTN2	NA	NA	NA	Ligand	Ligand
CNTNAP1	Receptor	NA	NA	Receptor	Receptor
CNTNAP2	Receptor	NA	NA	Receptor	Receptor
COL10A1	NA	Ligand	Ligand	NA	Ligand
COL11A1	NA	Ligand	Ligand	Ligand	Ligand
COL11A2	NA	Ligand	Ligand	NA	Ligand
COL12A1	NA	Ligand	Ligand	NA	Ligand
COL13A1	NA	NA	Ligand	Receptor	NA
COL14A1	NA	Ligand	Ligand	Ligand	Ligand
COL15A1	NA	Ligand	Ligand	NA	Ligand
COL16A1	NA	Ligand	Ligand	NA	Ligand
COL17A1	NA	Ligand	Ligand	Receptor	Ligand
COL18A1	NA	Ligand	Ligand	Ligand	Ligand
COL19A1	NA	Ligand	Ligand	NA	Ligand
COL1A1	Ligand	Ligand	Ligand	Ligand	Ligand
COL1A2	Ligand	Ligand	Ligand	Ligand	Ligand
COL20A1	NA	Ligand	Ligand	NA	Ligand
COL21A1	NA	Ligand	Ligand	NA	Ligand
COL22A1	NA	Ligand	Ligand	NA	Ligand
COL24A1	NA	Ligand	Ligand	NA	Ligand
COL26A1	NA	Ligand	Ligand	NA	Ligand
COL27A1	NA	Ligand	Ligand	NA	Ligand
COL28A1	NA	Ligand	Ligand	NA	Ligand
COL2A1	Ligand	Ligand	Ligand	Ligand	Ligand
COL3A1	NA	Ligand	Ligand	Ligand	Ligand
COL4A1	Ligand	Ligand	Ligand	Ligand	Ligand
COL4A2	Ligand	Ligand	Ligand	Ligand	Ligand
COL4A3	Ligand	Ligand	Ligand	Ligand	Ligand
COL4A4	Ligand	Ligand	Ligand	Ligand	Ligand
COL4A5	Ligand	Ligand	Ligand	Ligand	Ligand
COL4A6	Ligand	Ligand	Ligand	Ligand	Ligand
COL5A1	NA	Ligand	Ligand	Ligand	Ligand
COL5A2	NA	Ligand	Ligand	Ligand	Ligand
COL5A3	NA	Ligand	Ligand	Ligand	Ligand
COL6A1	Ligand	Ligand	Ligand	Ligand	Ligand
COL6A2	Ligand	Ligand	Ligand	Ligand	Ligand
COL6A3	Ligand	Ligand	Ligand	Ligand	Ligand
COL6A5	Ligand	Ligand	Ligand	NA	Ligand
COL6A6	Ligand	Ligand	Ligand	NA	Ligand
COL7A1	NA	Ligand	Ligand	Ligand	Ligand
COL8A1	NA	Ligand	Ligand	Ligand	Ligand
COL8A2	NA	Ligand	Ligand	NA	Ligand
COL9A1	Ligand	Ligand	Ligand	Ligand	Ligand
COL9A2	Ligand	Ligand	Ligand	Ligand	Ligand
COL9A3	Ligand	Ligand	Ligand	Ligand	Ligand
COLQ	NA	NA	NA	Ligand	Ligand
COMP	Ligand	NA	NA	NA	Ligand
CORT	Ligand	NA	NA	Ligand	Ligand
CP	NA	NA	NA	Ligand	Ligand
CPAMD8	NA	NA	NA	Ligand	Ligand
CR1	NA	NA	NA	Receptor	Receptor
CR2	Receptor	Receptor	Receptor	NA	Receptor
CRH	Ligand	NA	NA	Ligand	Ligand
CRHR1	Receptor	NA	NA	Receptor	Receptor
CRHR2	Receptor	NA	NA	Receptor	Receptor
CRLF1	NA	NA	Ligand	Ligand	Ligand
CRLF2	Receptor	NA	Receptor	NA	Receptor
CRP	NA	NA	NA	Ligand	Ligand
CSF1	Ligand	Ligand	Ligand	NA	Ligand
CSF1R	Receptor	Receptor	Receptor	Receptor	Receptor
CSF2	Ligand	Ligand	Ligand	Ligand	Ligand
CSF2RA	Receptor	NA	Receptor	NA	Receptor
CSF2RB	Receptor	NA	Receptor	Receptor	Receptor
CSF3	Ligand	Ligand	Ligand	Ligand	Ligand
CSF3R	Receptor	NA	Receptor	NA	Receptor
CSH1	NA	NA	NA	Ligand	Ligand
CSH2	NA	NA	NA	Ligand	Ligand
CSHL1	NA	NA	NA	Ligand	Ligand
CSPG4	Ligand	NA	NA	Receptor	NA
CTF1	Ligand	NA	Ligand	Ligand	Ligand
CTHRC1	NA	NA	NA	Ligand	Ligand
CTLA4	Receptor	NA	Receptor	NA	Receptor
CTSG	Ligand	NA	NA	NA	Ligand
CUBN	NA	NA	NA	Ligand	Ligand
CX3CL1	Ligand	NA	Ligand	NA	Ligand
CX3CR1	Receptor	Receptor	Receptor	Receptor	Receptor
CXCL1	Ligand	Ligand	Ligand	Ligand	Ligand
CXCL10	Ligand	Ligand	Ligand	Ligand	Ligand
CXCL11	Ligand	Ligand	Ligand	Ligand	Ligand
CXCL12	Ligand	Ligand	Ligand	Ligand	Ligand
CXCL13	Ligand	Ligand	Ligand	Ligand	Ligand
CXCL16	Ligand	NA	Ligand	NA	Ligand
CXCL2	Ligand	Ligand	Ligand	Ligand	Ligand
CXCL3	Ligand	Ligand	Ligand	Ligand	Ligand
CXCL5	Ligand	Ligand	Ligand	Ligand	Ligand
CXCL6	Ligand	Ligand	Ligand	Ligand	Ligand
CXCL8	Ligand	Ligand	Ligand	NA	Ligand
CXCL9	Ligand	Ligand	Ligand	Ligand	Ligand
CXCR1	Receptor	Receptor	Receptor	Receptor	Receptor
CXCR2	Receptor	Receptor	Receptor	Receptor	Receptor
CXCR3	Receptor	Receptor	Receptor	Receptor	Receptor
CXCR4	Receptor	Receptor	Receptor	Receptor	Receptor
CXCR5	Receptor	Receptor	Receptor	Receptor	Receptor
CXCR6	Receptor	NA	Receptor	Receptor	Receptor
DAG1	Receptor	NA	NA	NA	Receptor
DCBLD2	NA	NA	NA	Receptor	Receptor
DCC	NA	NA	NA	Receptor	Receptor
DCHS1	NA	NA	NA	Receptor	Receptor
DCN	NA	NA	NA	Ligand	Ligand
DDR1	NA	NA	NA	Receptor	Receptor
DDR2	NA	NA	NA	Receptor	Receptor
DEFB1	NA	NA	NA	Ligand	Ligand
DEFB103A	NA	NA	NA	Ligand	Ligand
DEFB4A	NA	NA	NA	Ligand	Ligand
DHH	Ligand	NA	NA	Ligand	Ligand
DKK1	NA	NA	NA	Ligand	Ligand
DKK2	NA	NA	NA	Ligand	Ligand
DLK1	Ligand	NA	NA	NA	Ligand
DLK2	NA	NA	NA	Receptor	Receptor
DLL1	Ligand	NA	Ligand	Receptor	Ligand
DLL3	Ligand	NA	Ligand	Receptor	Ligand
DLL4	Ligand	NA	Ligand	Receptor	Ligand
DMP1	Ligand	NA	NA	NA	Ligand
DRD2	NA	NA	NA	Receptor	Receptor
DRD4	NA	NA	NA	Receptor	Receptor
DSC1	Ligand	NA	NA	NA	Ligand
DSC2	Ligand	NA	NA	NA	Ligand
DSC3	Receptor	NA	NA	NA	Receptor
DSCAM	NA	NA	NA	Ligand	Ligand
DSPP	Ligand	NA	NA	NA	Ligand
DYSF	NA	NA	NA	Receptor	Receptor
EBI3	NA	NA	Ligand	Ligand	Ligand
ECM1	NA	NA	NA	Ligand	Ligand
EDA	Ligand	NA	Ligand	NA	Ligand
EDA2R	Receptor	NA	Receptor	Receptor	Receptor
EDAR	Receptor	NA	Receptor	Receptor	Receptor
EDIL3	NA	NA	NA	Ligand	Ligand
EDN1	Ligand	NA	Ligand	Ligand	Ligand
EDN2	Ligand	NA	Ligand	Ligand	Ligand
EDN3	Ligand	NA	Ligand	Ligand	Ligand
EDNRA	Receptor	NA	Receptor	Receptor	Receptor
EDNRB	Receptor	NA	Receptor	Receptor	Receptor
EFEMP1	NA	NA	NA	Ligand	Ligand
EFEMP2	NA	NA	NA	Ligand	Ligand
EFNA1	Ligand	Ligand	NA	NA	Ligand
EFNA2	Ligand	NA	NA	Ligand	Ligand
EFNA3	Ligand	NA	NA	Receptor	NA
EFNA4	Ligand	Ligand	Ligand	NA	Ligand
EFNA5	Ligand	NA	Ligand	Receptor	Ligand
EFNB1	Ligand	NA	Ligand	Receptor	Ligand
EFNB2	Ligand	Receptor	NA	Receptor	Receptor
EFNB3	Ligand	Receptor	NA	Receptor	Receptor
EGF	Ligand	Ligand	Ligand	Receptor	Ligand
EGFL8	NA	NA	NA	Ligand	Ligand
EGFR	Receptor	NA	Receptor	NA	Receptor
ENG	NA	NA	NA	Receptor	Receptor
ENHO	Ligand	NA	NA	NA	Ligand
ENTPD1	Ligand	NA	NA	NA	Ligand
EPGN	Ligand	Ligand	NA	Ligand	Ligand
EPHA1	Receptor	Receptor	NA	NA	Receptor
EPHA2	Receptor	Receptor	Receptor	Receptor	Receptor
EPHA3	Receptor	NA	Receptor	NA	Receptor
EPHA4	Receptor	Receptor	Receptor	Receptor	Receptor
EPHA5	Receptor	Receptor	NA	Receptor	Receptor
EPHA6	NA	NA	NA	Receptor	Receptor
EPHA7	Receptor	Receptor	Receptor	NA	Receptor
EPHA8	Receptor	Receptor	NA	Receptor	Receptor
EPHB1	Receptor	Receptor	Receptor	Receptor	Receptor
EPHB2	Receptor	Receptor	Receptor	Receptor	Receptor
EPHB3	Receptor	Receptor	NA	Receptor	Receptor
EPHB4	Receptor	Receptor	NA	Receptor	Receptor
EPHB6	Receptor	NA	NA	NA	Receptor
EPO	Ligand	Ligand	Ligand	Ligand	Ligand
EPOR	Receptor	NA	Receptor	NA	Receptor
ERBB2	Receptor	NA	NA	NA	Receptor
ERBB3	Receptor	NA	NA	NA	Receptor
ERBB4	Receptor	Receptor	Receptor	Receptor	Receptor
EREG	Ligand	Ligand	NA	NA	Ligand
ESAM	NA	NA	NA	Receptor	Receptor
F10	NA	Ligand	NA	Ligand	Ligand
F11	NA	NA	NA	Ligand	Ligand
F11R	NA	Receptor	NA	Receptor	Receptor
F12	NA	NA	NA	Ligand	Ligand
F13A1	NA	NA	NA	Ligand	Ligand
F2	Ligand	Ligand	NA	Ligand	Ligand
F2R	Receptor	NA	NA	Receptor	Receptor
F2RL1	Receptor	NA	NA	Receptor	Receptor
F2RL2	Receptor	NA	NA	Receptor	Receptor
F2RL3	Receptor	NA	NA	Receptor	Receptor
F7	NA	NA	NA	Ligand	Ligand
F8	NA	NA	NA	Ligand	Ligand
F9	NA	NA	NA	Ligand	Ligand
FAP	NA	NA	NA	Receptor	Receptor
FARP2	NA	NA	NA	Ligand	Ligand
FAS	Receptor	NA	Receptor	NA	Receptor
FASLG	Ligand	Ligand	Ligand	NA	Ligand
FAT4	NA	NA	NA	Ligand	Ligand
FBLN1	NA	NA	NA	Ligand	Ligand
FBLN2	NA	NA	NA	Ligand	Ligand
FBN1	NA	Ligand	NA	Ligand	Ligand
FCER1A	NA	NA	NA	Receptor	Receptor
FCER2	Ligand	NA	NA	NA	Ligand
FCGR1A	NA	NA	NA	Receptor	Receptor
FCN2	NA	NA	NA	Ligand	Ligand
FGA	NA	NA	NA	Ligand	Ligand
FGB	NA	NA	NA	Ligand	Ligand
FGF1	Ligand	Ligand	NA	Ligand	Ligand
FGF10	Ligand	NA	NA	Ligand	Ligand
FGF11	NA	NA	NA	Ligand	Ligand
FGF16	Ligand	NA	NA	Ligand	Ligand
FGF17	Ligand	NA	NA	Ligand	Ligand
FGF18	Ligand	NA	NA	Ligand	Ligand
FGF19	Ligand	NA	NA	Ligand	Ligand
FGF2	Ligand	Ligand	NA	Ligand	Ligand
FGF20	Ligand	NA	NA	Ligand	Ligand
FGF21	Ligand	NA	NA	Ligand	Ligand
FGF22	Ligand	NA	NA	Ligand	Ligand
FGF23	Ligand	NA	NA	Ligand	Ligand
FGF3	Ligand	NA	NA	Ligand	Ligand
FGF4	Ligand	NA	NA	Ligand	Ligand
FGF5	Ligand	NA	NA	Ligand	Ligand
FGF6	Ligand	NA	NA	Ligand	Ligand
FGF7	Ligand	NA	NA	Ligand	Ligand
FGF8	Ligand	NA	NA	Ligand	Ligand
FGF9	Ligand	NA	NA	Ligand	Ligand
FGFR1	Receptor	Receptor	NA	Receptor	Receptor
FGFR2	Receptor	NA	NA	NA	Receptor
FGFR3	Receptor	NA	NA	NA	Receptor
FGFR4	Receptor	NA	NA	NA	Receptor
FGFRL1	NA	NA	NA	Receptor	Receptor
FGG	NA	NA	NA	Ligand	Ligand
FGL1	NA	NA	Ligand	Ligand	Ligand
FLT1	Receptor	NA	Receptor	NA	Receptor
FLT3	Receptor	Receptor	Receptor	Receptor	Receptor
FLT3LG	Ligand	Ligand	Ligand	NA	Ligand
FLT4	Receptor	NA	Receptor	NA	Receptor
FN1	Ligand	Ligand	Ligand	Ligand	Ligand
FPR1	Receptor	NA	NA	Receptor	Receptor
FPR2	Receptor	Receptor	Receptor	Receptor	Receptor
FPR3	NA	NA	NA	Receptor	Receptor
FSHB	Ligand	NA	NA	Ligand	Ligand
FSHR	Receptor	NA	NA	Receptor	Receptor
FST	NA	NA	NA	Ligand	Ligand
FXYD6	NA	NA	NA	Receptor	Receptor
FZD1	Receptor	Receptor	Receptor	Receptor	Receptor
FZD10	Receptor	Receptor	Receptor	Receptor	Receptor
FZD2	Receptor	Receptor	Receptor	Receptor	Receptor
FZD3	Receptor	Receptor	Receptor	Receptor	Receptor
FZD4	Receptor	Receptor	NA	Receptor	Receptor
FZD5	Receptor	Receptor	Receptor	Receptor	Receptor
FZD6	Receptor	Receptor	Receptor	Receptor	Receptor
FZD7	Receptor	Receptor	Receptor	Receptor	Receptor
FZD8	Receptor	NA	Receptor	Receptor	Receptor
FZD9	Receptor	Receptor	Receptor	Receptor	Receptor
GABBR2	NA	NA	NA	Receptor	Receptor
GAL	Ligand	NA	Ligand	Ligand	Ligand
GALP	Ligand	NA	NA	Ligand	Ligand
GALR1	Receptor	NA	NA	Receptor	Receptor
GALR2	Receptor	NA	Receptor	Receptor	Receptor
GALR3	Receptor	NA	NA	Receptor	Receptor
GAS6	Ligand	NA	Ligand	Ligand	Ligand
GAST	NA	NA	Ligand	Ligand	Ligand
GCG	Ligand	NA	NA	Ligand	Ligand
GCGR	Receptor	NA	NA	Receptor	Receptor
GDF1	Ligand	Ligand	Ligand	NA	Ligand
GDF10	Ligand	Ligand	Ligand	Ligand	Ligand
GDF11	Ligand	Ligand	Ligand	Ligand	Ligand
GDF15	Ligand	NA	NA	NA	Ligand
GDF2	Ligand	Ligand	Ligand	Ligand	Ligand
GDF3	Ligand	Ligand	Ligand	NA	Ligand
GDF5	Ligand	Ligand	Ligand	Ligand	Ligand
GDF6	Ligand	Ligand	Ligand	Ligand	Ligand
GDF7	Ligand	Ligand	Ligand	Ligand	Ligand
GDF9	Ligand	Ligand	Ligand	Ligand	Ligand
GDNF	Ligand	Ligand	Ligand	Ligand	Ligand
GFRA1	Receptor	NA	Receptor	Receptor	Receptor
GFRA2	Receptor	NA	Receptor	Ligand	Receptor
GFRA3	Receptor	NA	NA	Receptor	Receptor
GFRA4	Receptor	NA	NA	Ligand	NA
GH1	Ligand	NA	Ligand	Ligand	Ligand
GH2	NA	NA	Ligand	Ligand	Ligand
GHR	Receptor	NA	Receptor	NA	Receptor
GHRH	Ligand	NA	NA	Ligand	Ligand
GHRHR	Receptor	NA	NA	Receptor	Receptor
GHRL	Ligand	NA	NA	Ligand	Ligand
GHSR	Receptor	NA	NA	Receptor	Receptor
GIP	Ligand	NA	NA	Ligand	Ligand
GIPR	Receptor	NA	NA	Receptor	Receptor
GJB2	NA	NA	NA	Receptor	Receptor
GLG1	Receptor	NA	NA	NA	Receptor
GLP1R	Receptor	NA	NA	Receptor	Receptor
GLP2R	Receptor	NA	NA	Receptor	Receptor
GNAS	NA	NA	NA	Ligand	Ligand
GNRH1	Ligand	NA	NA	Ligand	Ligand
GNRH2	NA	NA	NA	Ligand	Ligand
GNRHR	Receptor	NA	NA	Receptor	Receptor
GP1BA	NA	NA	NA	Receptor	Receptor
GP1BB	Receptor	NA	NA	Receptor	Receptor
GP5	Receptor	NA	NA	NA	Receptor
GP6	Receptor	NA	NA	NA	Receptor
GP9	Receptor	NA	NA	Receptor	Receptor
GPC2	NA	NA	NA	Receptor	Receptor
GPC4	NA	NA	NA	Receptor	Receptor
GPC5	NA	NA	NA	Receptor	Receptor
GPHA2	NA	NA	NA	Ligand	Ligand
GPI	NA	NA	NA	Ligand	Ligand
GPR135	NA	NA	NA	Receptor	Receptor
GPR151	NA	NA	NA	Receptor	Receptor
GPR162	NA	NA	NA	Receptor	Receptor
GPR182	NA	NA	NA	Receptor	Receptor
GPR19	Receptor	NA	NA	NA	Receptor
GPR37	Receptor	NA	NA	Receptor	Receptor
GPR37L1	Receptor	NA	NA	Receptor	Receptor
GPR39	NA	NA	NA	Receptor	Receptor
GPR75	NA	NA	NA	Receptor	Receptor
GPR83	Receptor	NA	NA	NA	Receptor
GREM1	NA	NA	NA	Ligand	Ligand
GRIN2C	NA	NA	NA	Receptor	Receptor
GRIN2D	NA	NA	NA	Receptor	Receptor
GRM5	NA	NA	NA	Receptor	Receptor
GRN	Ligand	NA	NA	NA	Ligand
GRP	Ligand	NA	NA	Ligand	Ligand
GRPR	Receptor	NA	NA	Receptor	Receptor
GUCA2A	Ligand	NA	Ligand	Ligand	Ligand
GUCA2B	Ligand	NA	NA	Ligand	Ligand
GUCY2C	Receptor	NA	Receptor	Receptor	Receptor
GUCY2D	NA	NA	NA	Receptor	Receptor
GYPE	NA	NA	NA	Receptor	Receptor
GZMA	Ligand	NA	NA	NA	Ligand
HAS2	NA	NA	NA	Receptor	Receptor
HAVCR2	Receptor	Receptor	Receptor	NA	Receptor
HBEGF	Ligand	NA	Ligand	NA	Ligand
HCRT	Ligand	NA	NA	Ligand	Ligand
HCRTR1	Receptor	NA	NA	Receptor	Receptor
HCRTR2	Receptor	NA	NA	Receptor	Receptor
HCST	Receptor	NA	NA	NA	Receptor
HFE	NA	NA	NA	Receptor	Receptor
HGF	Ligand	Ligand	Ligand	Ligand	Ligand
HHIPL2	NA	NA	NA	Ligand	Ligand
HHLA2	NA	NA	Ligand	NA	Ligand
HHLA3	NA	NA	NA	Ligand	Ligand
HLA-A	Ligand	NA	Ligand	NA	Ligand
HLA-B	Ligand	NA	Ligand	NA	Ligand
HLA-C	Ligand	NA	Ligand	Receptor	Ligand
HLA-DMA	Ligand	NA	NA	NA	Ligand
HLA-DMB	Ligand	NA	NA	NA	Ligand
HLA-DOA	Ligand	NA	NA	NA	Ligand
HLA-DOB	Ligand	NA	NA	NA	Ligand
HLA-DPA1	Ligand	NA	Ligand	NA	Ligand
HLA-DPB1	Ligand	NA	Ligand	NA	Ligand
HLA-DQA1	Ligand	NA	Ligand	NA	Ligand
HLA-DQA2	Ligand	NA	Ligand	NA	Ligand
HLA-DQB1	Ligand	NA	Ligand	NA	Ligand
HLA-DQB2	NA	NA	Ligand	NA	Ligand
HLA-DRA	Ligand	NA	Ligand	NA	Ligand
HLA-DRB1	Ligand	NA	Ligand	NA	Ligand
HLA-DRB5	Ligand	NA	Ligand	NA	Ligand
HLA-E	Ligand	NA	Ligand	Receptor	Ligand
HLA-F	Ligand	NA	Ligand	Receptor	Ligand
HLA-G	Ligand	Receptor	Ligand	NA	Ligand
HMGB1	NA	NA	Ligand	Ligand	Ligand
HP	NA	NA	NA	Ligand	Ligand
HRG	NA	NA	NA	Ligand	Ligand
HRH4	NA	NA	Receptor	Receptor	Receptor
HSP90AA1	NA	NA	NA	Ligand	Ligand
HSPG2	Ligand	NA	NA	Ligand	Ligand
HTR2A	NA	NA	NA	Receptor	Receptor
HTR2C	NA	NA	NA	Receptor	Receptor
HTR6	NA	NA	NA	Receptor	Receptor
IAPP	Ligand	NA	NA	Ligand	Ligand
IBSP	Ligand	NA	NA	Ligand	Ligand
ICAM1	NA	Receptor	Receptor	NA	Receptor
ICAM2	NA	NA	Receptor	Receptor	Receptor
ICAM3	NA	NA	Receptor	NA	Receptor
ICAM4	NA	Ligand	NA	NA	Ligand
ICAM5	Ligand	NA	NA	Receptor	NA
ICOS	Receptor	NA	NA	NA	Receptor
IFITM1	NA	NA	NA	Receptor	Receptor
IFNA10	Ligand	Ligand	Ligand	Ligand	Ligand
IFNA14	Ligand	Ligand	Ligand	Ligand	Ligand
IFNA16	Ligand	Ligand	Ligand	Ligand	Ligand
IFNA17	Ligand	Ligand	Ligand	Ligand	Ligand
IFNA2	Ligand	Ligand	Ligand	Ligand	Ligand
IFNA21	Ligand	Ligand	Ligand	Ligand	Ligand
IFNA4	Ligand	Ligand	Ligand	Ligand	Ligand
IFNA5	Ligand	Ligand	Ligand	Ligand	Ligand
IFNA6	Ligand	Ligand	Ligand	Ligand	Ligand
IFNA7	Ligand	Ligand	Ligand	Ligand	Ligand
IFNA8	Ligand	Ligand	Ligand	Ligand	Ligand
IFNAR1	Receptor	NA	Receptor	Receptor	Receptor
IFNAR2	Receptor	NA	Receptor	NA	Receptor
IFNB1	Ligand	Ligand	Ligand	Ligand	Ligand
IFNE	Ligand	Ligand	Ligand	NA	Ligand
IFNG	Ligand	Ligand	Ligand	Ligand	Ligand
IFNGR1	Receptor	NA	Receptor	Receptor	Receptor
IFNGR2	Receptor	NA	Receptor	Receptor	Receptor
IFNK	Ligand	Ligand	Ligand	NA	Ligand
IFNL1	NA	Ligand	Ligand	Ligand	Ligand
IFNL2	NA	Ligand	Ligand	Ligand	Ligand
IFNL3	NA	Ligand	Ligand	Ligand	Ligand
IFNLR1	NA	NA	Receptor	Receptor	Receptor
IFNW1	Ligand	Ligand	Ligand	Ligand	Ligand
IGF1	Ligand	Ligand	NA	Ligand	Ligand
IGF1R	Receptor	Receptor	NA	Receptor	Receptor
IGF2	Ligand	Ligand	NA	Ligand	Ligand
IGF2R	Receptor	Receptor	NA	Receptor	Receptor
IGFBP4	NA	NA	NA	Ligand	Ligand
IGFL1	NA	NA	NA	Ligand	Ligand
IGFL2	NA	NA	NA	Ligand	Ligand
IGFL3	Ligand	NA	NA	Ligand	Ligand
IGFLR1	Receptor	NA	NA	Receptor	Receptor
IGSF11	Receptor	NA	NA	NA	Receptor
IHH	Ligand	NA	Ligand	Ligand	Ligand
IL10	Ligand	Ligand	Ligand	Ligand	Ligand
IL10RA	Receptor	NA	Receptor	Receptor	Receptor
IL10RB	Receptor	NA	Receptor	Receptor	Receptor
IL11	Ligand	Ligand	Ligand	Ligand	Ligand
IL11RA	Receptor	NA	Receptor	Receptor	Receptor
IL12A	NA	NA	Ligand	Ligand	Ligand
IL12B	NA	NA	Ligand	Ligand	Ligand
IL12RB1	Receptor	NA	Receptor	Receptor	Receptor
IL12RB2	Receptor	NA	Receptor	Receptor	Receptor
IL13	Ligand	Ligand	Ligand	Ligand	Ligand
IL13RA1	Receptor	NA	Receptor	Receptor	Receptor
IL13RA2	Receptor	Receptor	Receptor	Receptor	Receptor
IL15	Ligand	Ligand	Ligand	Ligand	Ligand
IL15RA	Receptor	NA	Receptor	Ligand	Receptor
IL16	Ligand	NA	Ligand	Ligand	Ligand
IL17A	Ligand	Ligand	Ligand	Ligand	Ligand
IL17B	Ligand	NA	Ligand	Ligand	Ligand
IL17C	Ligand	Ligand	Ligand	NA	Ligand
IL17F	Ligand	Ligand	Ligand	Ligand	Ligand
IL17RA	Receptor	NA	Receptor	Receptor	Receptor
IL17RB	Receptor	NA	Receptor	NA	Receptor
IL17RC	Receptor	NA	Receptor	Receptor	Receptor
IL17RE	Receptor	NA	Receptor	NA	Receptor
IL18	Ligand	Ligand	Ligand	Ligand	Ligand
IL18R1	Receptor	NA	Receptor	Receptor	Receptor
IL18RAP	Receptor	NA	Receptor	Receptor	Receptor
IL19	Ligand	Ligand	Ligand	Ligand	Ligand
IL1A	Ligand	Ligand	Ligand	Ligand	Ligand
IL1B	Ligand	Ligand	Ligand	Ligand	Ligand
IL1F10	Ligand	Ligand	Ligand	Ligand	Ligand
IL1R1	Receptor	NA	Receptor	NA	Receptor
IL1R2	Receptor	NA	Receptor	NA	Receptor
IL1RAP	Receptor	NA	Receptor	NA	Receptor
IL1RAPL1	NA	NA	Receptor	Receptor	Receptor
IL1RAPL2	NA	NA	Receptor	NA	Receptor
IL1RL1	Receptor	NA	Receptor	NA	Receptor
IL1RL2	Receptor	NA	Receptor	Receptor	Receptor
IL1RN	NA	Ligand	Ligand	Ligand	Ligand
IL2	Ligand	Ligand	Ligand	Ligand	Ligand
IL20	Ligand	Ligand	Ligand	Ligand	Ligand
IL20RA	Receptor	NA	Receptor	Receptor	Receptor
IL20RB	Receptor	NA	Receptor	NA	Receptor
IL21	Ligand	Ligand	Ligand	Ligand	Ligand
IL21R	Receptor	NA	Receptor	Receptor	Receptor
IL22	Ligand	Ligand	Ligand	Ligand	Ligand
IL22RA1	Receptor	NA	Receptor	Ligand	Receptor
IL22RA2	NA	NA	Receptor	Ligand	NA
IL23A	Ligand	NA	Ligand	Ligand	Ligand
IL23R	Receptor	NA	Receptor	Receptor	Receptor
IL24	Ligand	Ligand	Ligand	Ligand	Ligand
IL25	Ligand	Ligand	Ligand	Ligand	Ligand
IL26	Ligand	Ligand	Ligand	Ligand	Ligand
IL27	NA	NA	Ligand	Ligand	Ligand
IL27RA	Receptor	NA	Receptor	Receptor	Receptor
IL2RA	Receptor	NA	Receptor	Receptor	Receptor
IL2RB	Receptor	NA	Receptor	Receptor	Receptor
IL2RG	Receptor	NA	Receptor	Receptor	Receptor
IL3	Ligand	Ligand	Ligand	Ligand	Ligand
IL31	Ligand	NA	Ligand	Ligand	Ligand
IL31RA	Receptor	NA	Receptor	Receptor	Receptor
IL33	Ligand	Ligand	Ligand	NA	Ligand
IL34	Ligand	Ligand	Ligand	Ligand	Ligand
IL36A	Ligand	Ligand	Ligand	NA	Ligand
IL36B	Ligand	Ligand	Ligand	NA	Ligand
IL36G	Ligand	Ligand	Ligand	NA	Ligand
IL36RN	Ligand	Ligand	Ligand	NA	Ligand
IL37	Ligand	Ligand	Ligand	NA	Ligand
IL3RA	Receptor	NA	Receptor	Receptor	Receptor
IL4	Ligand	Ligand	Ligand	Ligand	Ligand
IL4R	Receptor	NA	Receptor	NA	Receptor
IL5	Ligand	Ligand	Ligand	Ligand	Ligand
IL5RA	Receptor	NA	Receptor	NA	Receptor
IL6	Ligand	Ligand	Ligand	Ligand	Ligand
IL6R	Receptor	NA	Receptor	NA	Receptor
IL6ST	Receptor	NA	Receptor	NA	Receptor
IL7	Ligand	Ligand	Ligand	Ligand	Ligand
IL7R	Receptor	NA	Receptor	NA	Receptor
IL9	Ligand	Ligand	Ligand	Ligand	Ligand
IL9R	Receptor	NA	Receptor	NA	Receptor
INHA	Ligand	NA	NA	Ligand	Ligand
INHBA	Ligand	Ligand	Ligand	Ligand	Ligand
INHBB	Ligand	Ligand	Ligand	Ligand	Ligand
INHBC	Ligand	Ligand	NA	Ligand	Ligand
INHBE	Ligand	Ligand	NA	Ligand	Ligand
INS	Ligand	Ligand	NA	Ligand	Ligand
INSL3	Ligand	NA	NA	Ligand	Ligand
INSL5	Ligand	NA	NA	Ligand	Ligand
INSR	Receptor	Receptor	NA	Receptor	Receptor
ITGA1	Receptor	NA	Receptor	NA	Receptor
ITGA10	Receptor	NA	Receptor	Ligand	Receptor
ITGA11	Receptor	NA	Receptor	Receptor	Receptor
ITGA2	Receptor	NA	Receptor	Receptor	Receptor
ITGA2B	Receptor	NA	Receptor	Receptor	Receptor
ITGA3	Receptor	NA	NA	Receptor	Receptor
ITGA4	NA	NA	Receptor	Receptor	Receptor
ITGA5	Receptor	NA	Receptor	Receptor	Receptor
ITGA6	Receptor	NA	NA	Receptor	Receptor
ITGA7	Receptor	NA	NA	Receptor	Receptor
ITGA8	Receptor	NA	Receptor	Receptor	Receptor
ITGA9	NA	NA	Receptor	Receptor	Receptor
ITGAD	NA	NA	NA	Receptor	Receptor
ITGAE	Receptor	NA	NA	Receptor	Receptor
ITGAL	Receptor	Receptor	Ligand	Receptor	Receptor
ITGAM	Receptor	NA	Receptor	Receptor	Receptor
ITGAV	Receptor	NA	Receptor	Receptor	Receptor
ITGAX	Receptor	NA	NA	Receptor	Receptor
ITGB1	NA	NA	Receptor	Receptor	Receptor
ITGB2	NA	NA	NA	Receptor	Receptor
ITGB3	Receptor	NA	Receptor	Receptor	Receptor
ITGB4	Receptor	NA	NA	NA	Receptor
ITGB5	Receptor	NA	Receptor	Receptor	Receptor
ITGB6	Receptor	NA	NA	Receptor	Receptor
ITGB7	NA	NA	Receptor	Receptor	Receptor
ITGB8	Receptor	NA	NA	Receptor	Receptor
ITIH2	NA	NA	NA	Ligand	Ligand
JAG1	NA	NA	Ligand	NA	Ligand
JAG2	Ligand	NA	Ligand	Receptor	Ligand
JAM3	NA	Ligand	NA	NA	Ligand
KCNA3	NA	NA	NA	Receptor	Receptor
KCND1	NA	NA	NA	Receptor	Receptor
KCND2	NA	NA	NA	Receptor	Receptor
KCNJ10	NA	NA	NA	Receptor	Receptor
KCNJ15	NA	NA	NA	Receptor	Receptor
KCNJ4	NA	NA	NA	Receptor	Receptor
KDR	Receptor	NA	Receptor	NA	Receptor
KEL	NA	NA	NA	Receptor	Receptor
KIDINS220	NA	NA	NA	Receptor	Receptor
KIR2DL1	Receptor	Receptor	Receptor	Receptor	Receptor
KIR2DL3	Receptor	Receptor	Receptor	Receptor	Receptor
KIR2DL4	NA	NA	Receptor	Receptor	Receptor
KIR3DL1	Receptor	Receptor	Receptor	Receptor	Receptor
KIR3DL2	Receptor	Receptor	Receptor	Receptor	Receptor
KIR3DL3	Receptor	NA	NA	NA	Receptor
KISS1	Ligand	NA	NA	Ligand	Ligand
KISS1R	Receptor	NA	NA	Receptor	Receptor
KIT	Receptor	Receptor	Receptor	Receptor	Receptor
KITLG	Ligand	Ligand	Ligand	NA	Ligand
KLK3	Ligand	NA	NA	Ligand	Ligand
KLRB1	Receptor	Receptor	NA	NA	Receptor
KLRC1	Receptor	Receptor	Receptor	Receptor	Receptor
KLRC2	Receptor	Receptor	NA	Receptor	Receptor
KLRD1	NA	NA	Receptor	Receptor	Receptor
KLRF1	NA	Receptor	NA	NA	Receptor
KLRF2	NA	Receptor	NA	NA	Receptor
KLRG1	Receptor	Receptor	Receptor	Receptor	Receptor
KLRK1	Receptor	Receptor	Receptor	Receptor	Receptor
KNG1	Ligand	NA	NA	Ligand	Ligand
KREMEN1	NA	NA	NA	Ligand	Ligand
KREMEN2	NA	NA	NA	Receptor	Receptor
KRTAP4-12	NA	NA	NA	Ligand	Ligand
L1CAM	NA	NA	NA	Receptor	Receptor
LACRT	NA	NA	NA	Ligand	Ligand
LAG3	NA	NA	Receptor	NA	Receptor
LAIR1	NA	Receptor	NA	NA	Receptor
LAMA1	Ligand	NA	NA	Ligand	Ligand
LAMA2	Ligand	NA	NA	Ligand	Ligand
LAMA3	Ligand	Ligand	NA	Ligand	Ligand
LAMA4	Ligand	NA	NA	Ligand	Ligand
LAMA5	Ligand	NA	NA	Ligand	Ligand
LAMB1	Ligand	NA	NA	Ligand	Ligand
LAMB2	Ligand	NA	NA	Ligand	Ligand
LAMB3	Ligand	NA	NA	Ligand	Ligand
LAMC1	Ligand	Ligand	NA	Ligand	Ligand
LAMC2	Ligand	NA	NA	Ligand	Ligand
LAMC3	Ligand	NA	NA	Ligand	Ligand
LAMP1	NA	NA	NA	Receptor	Receptor
LCK	Ligand	NA	NA	NA	Ligand
LCN1	NA	NA	Ligand	Ligand	Ligand
LCN2	NA	NA	NA	Ligand	Ligand
LDLR	NA	NA	NA	Receptor	Receptor
LEFTY1	NA	Ligand	NA	NA	Ligand
LEFTY2	NA	Ligand	NA	Ligand	Ligand
LEP	Ligand	Ligand	Ligand	Ligand	Ligand
LEPR	Receptor	NA	Receptor	NA	Receptor
LGALS1	NA	NA	Ligand	NA	Ligand
LGALS3	NA	NA	Ligand	NA	Ligand
LGALS3BP	NA	NA	NA	Ligand	Ligand
LGALS9	Ligand	Ligand	Ligand	NA	Ligand
LGR4	NA	NA	Receptor	Receptor	Receptor
LGR5	NA	NA	Receptor	Receptor	Receptor
LGR6	NA	NA	NA	Receptor	Receptor
LHB	Ligand	NA	NA	Ligand	Ligand
LHCGR	Receptor	NA	NA	Receptor	Receptor
LIF	Ligand	Ligand	Ligand	Ligand	Ligand
LIFR	Receptor	NA	Receptor	NA	Receptor
LILRA4	NA	Receptor	NA	NA	Receptor
LILRB1	Receptor	NA	Receptor	Receptor	Receptor
LILRB2	Receptor	Receptor	Receptor	Receptor	Receptor
LILRB3	Receptor	NA	NA	NA	Receptor
LILRB4	NA	Receptor	NA	NA	Receptor
LIN7C	NA	NA	NA	Ligand	Ligand
LINGO1	NA	NA	NA	Receptor	Receptor
LIPC	NA	NA	NA	Ligand	Ligand
LIPH	NA	NA	NA	Ligand	Ligand
LMBR1L	NA	NA	Receptor	Receptor	Receptor
LPA	NA	NA	NA	Ligand	Ligand
LPAR1	NA	NA	NA	Receptor	Receptor
LPAR2	NA	NA	NA	Receptor	Receptor
LPAR3	NA	NA	NA	Receptor	Receptor
LPAR4	NA	NA	NA	Receptor	Receptor
LPL	NA	NA	NA	Ligand	Ligand
LRP1	Receptor	NA	NA	NA	Receptor
LRP11	NA	NA	NA	Receptor	Receptor
LRP1B	NA	NA	NA	Ligand	Ligand
LRP2	NA	NA	NA	Receptor	Receptor
LRP5	Receptor	NA	Receptor	NA	Receptor
LRP6	Receptor	NA	Receptor	NA	Receptor
LRPAP1	NA	NA	NA	Ligand	Ligand
LRRC4	Ligand	NA	NA	NA	Ligand
LRRC4B	Ligand	NA	NA	NA	Ligand
LRRC4C	Ligand	NA	NA	Receptor	NA
LSR	NA	NA	NA	Receptor	Receptor
LTA	Ligand	Ligand	Ligand	Ligand	Ligand
LTB	NA	NA	Ligand	Receptor	NA
LTBP1	NA	NA	NA	Ligand	Ligand
LTBP3	NA	NA	NA	Ligand	Ligand
LTBR	Receptor	Receptor	Receptor	Receptor	Receptor
LTF	NA	NA	NA	Ligand	Ligand
LY6G5C	NA	NA	NA	Ligand	Ligand
LY6G6C	NA	NA	NA	Receptor	Receptor
LY86	NA	NA	NA	Ligand	Ligand
LY96	NA	NA	NA	Ligand	Ligand
LYPD3	NA	NA	NA	Ligand	Ligand
LYVE1	NA	NA	NA	Receptor	Receptor
LYZ	NA	NA	NA	Ligand	Ligand
MADCAM1	NA	NA	Ligand	Receptor	NA
MAG	NA	NA	NA	Receptor	Receptor
MAGED1	NA	NA	NA	Receptor	Receptor
MARCO	Receptor	NA	NA	Receptor	Receptor
MAS1	Receptor	NA	NA	Receptor	Receptor
MATN1	NA	NA	NA	Ligand	Ligand
MBL2	NA	NA	NA	Ligand	Ligand
MC1R	Receptor	NA	NA	Receptor	Receptor
MC2R	Receptor	NA	NA	Receptor	Receptor
MC3R	Receptor	NA	NA	Receptor	Receptor
MC4R	Receptor	NA	NA	Receptor	Receptor
MC5R	Receptor	NA	NA	Receptor	Receptor
MCAM	Receptor	NA	NA	NA	Receptor
MCHR1	Receptor	NA	NA	Receptor	Receptor
MCHR2	NA	NA	NA	Receptor	Receptor
MDK	Ligand	Ligand	NA	Ligand	Ligand
MEPE	NA	NA	NA	Ligand	Ligand
MERTK	Receptor	NA	Receptor	Receptor	Receptor
MET	Receptor	Receptor	Receptor	NA	Receptor
MFAP2	NA	NA	NA	Ligand	Ligand
MFAP5	NA	NA	NA	Ligand	Ligand
MFGE8	NA	NA	NA	Ligand	Ligand
MFNG	NA	NA	NA	Ligand	Ligand
MFRP	NA	NA	NA	Receptor	Receptor
MIA	NA	NA	NA	Ligand	Ligand
MICA	NA	NA	Ligand	NA	Ligand
MICB	NA	NA	Ligand	NA	Ligand
MIF	Ligand	NA	Ligand	NA	Ligand
MLN	NA	NA	NA	Ligand	Ligand
MLNR	NA	NA	NA	Receptor	Receptor
MMP1	NA	NA	NA	Ligand	Ligand
MMP12	NA	NA	NA	Ligand	Ligand
MMP13	NA	NA	NA	Ligand	Ligand
MMP2	NA	Ligand	NA	Ligand	Ligand
MMP24	NA	NA	NA	Receptor	Receptor
MMP7	NA	NA	NA	Ligand	Ligand
MMP9	NA	NA	NA	Ligand	Ligand
MOG	NA	NA	NA	Receptor	Receptor
MPL	Receptor	Receptor	Receptor	Receptor	Receptor
MRC1	Receptor	Receptor	NA	NA	Receptor
MRGPRX1	NA	NA	NA	Receptor	Receptor
MRGPRX2	NA	NA	NA	Receptor	Receptor
MST1	NA	Ligand	NA	Ligand	Ligand
MST1R	NA	Receptor	NA	Receptor	Receptor
MSTN	Ligand	Ligand	Ligand	Ligand	Ligand
MTNR1A	NA	NA	NA	Receptor	Receptor
MTNR1B	NA	NA	NA	Receptor	Receptor
MUC1	NA	NA	Receptor	NA	Receptor
MUC7	NA	NA	NA	Ligand	Ligand
MUSK	NA	NA	NA	Receptor	Receptor
MYOC	NA	NA	NA	Ligand	Ligand
NAMPT	Ligand	NA	NA	Ligand	Ligand
NCAN	NA	NA	NA	Ligand	Ligand
NCL	Receptor	NA	NA	NA	Receptor
NCR3	Receptor	Receptor	Receptor	Receptor	Receptor
NCR3LG1	NA	NA	Ligand	NA	Ligand
NCSTN	NA	NA	NA	Receptor	Receptor
NDP	NA	NA	NA	Ligand	Ligand
NEO1	NA	NA	NA	Receptor	Receptor
NFASC	Ligand	NA	NA	NA	Ligand
NGF	Ligand	Ligand	NA	Ligand	Ligand
NGFR	Receptor	Receptor	NA	Receptor	Receptor
NID1	NA	NA	NA	Ligand	Ligand
NID2	NA	NA	NA	Ligand	Ligand
NLGN1	Receptor	NA	NA	Receptor	Receptor
NLGN2	Receptor	NA	NA	Receptor	Receptor
NLGN3	Receptor	NA	NA	Receptor	Receptor
NMB	Ligand	NA	NA	Ligand	Ligand
NMBR	Receptor	NA	NA	Receptor	Receptor
NMS	Ligand	NA	NA	Ligand	Ligand
NMU	Ligand	NA	NA	Ligand	Ligand
NMUR1	Receptor	NA	NA	Receptor	Receptor
NMUR2	Receptor	NA	NA	Receptor	Receptor
NODAL	Ligand	Ligand	Ligand	Ligand	Ligand
NOTCH1	Receptor	Receptor	Receptor	Receptor	Receptor
NOTCH2	Receptor	Receptor	Receptor	Receptor	Receptor
NOTCH3	Receptor	Receptor	Receptor	Receptor	Receptor
NOTCH4	Receptor	Receptor	Receptor	Receptor	Receptor
NPB	Ligand	NA	NA	Ligand	Ligand
NPBWR1	Receptor	NA	NA	Receptor	Receptor
NPBWR2	NA	NA	NA	Receptor	Receptor
NPFF	Ligand	NA	NA	Ligand	Ligand
NPFFR1	Receptor	NA	NA	Receptor	Receptor
NPFFR2	Receptor	NA	NA	Receptor	Receptor
NPNT	NA	NA	NA	Ligand	Ligand
NPPA	Ligand	NA	NA	Ligand	Ligand
NPPB	Ligand	NA	NA	Ligand	Ligand
NPPC	Ligand	NA	NA	Ligand	Ligand
NPR1	Receptor	NA	NA	Receptor	Receptor
NPR2	Receptor	NA	NA	Receptor	Receptor
NPR3	Receptor	NA	Receptor	Receptor	Receptor
NPS	Ligand	NA	NA	Ligand	Ligand
NPSR1	Receptor	NA	NA	Receptor	Receptor
NPTN	NA	NA	NA	Receptor	Receptor
NPVF	Ligand	NA	NA	Ligand	Ligand
NPW	Ligand	NA	NA	Ligand	Ligand
NPY	Ligand	NA	NA	Ligand	Ligand
NPY1R	Receptor	NA	NA	Receptor	Receptor
NPY2R	Receptor	NA	NA	Receptor	Receptor
NPY4R	Receptor	NA	NA	Receptor	Receptor
NPY5R	Receptor	NA	NA	Receptor	Receptor
NRCAM	Receptor	NA	NA	Receptor	Receptor
NRG1	Ligand	NA	NA	NA	Ligand
NRG2	Ligand	Ligand	NA	Ligand	Ligand
NRG3	Ligand	Ligand	NA	Receptor	Ligand
NRG4	Ligand	Ligand	NA	Ligand	Ligand
NRP1	Receptor	NA	Receptor	NA	Receptor
NRP2	Receptor	NA	Receptor	NA	Receptor
NRSN1	NA	NA	NA	Receptor	Receptor
NRTN	Ligand	Ligand	Ligand	Ligand	Ligand
NRXN1	Ligand	NA	NA	Receptor	NA
NRXN2	Ligand	NA	NA	Receptor	NA
NRXN3	Ligand	NA	NA	Receptor	NA
NT5E	NA	NA	NA	Receptor	Receptor
NTF3	Ligand	Ligand	NA	Ligand	Ligand
NTF4	Ligand	Ligand	NA	Ligand	Ligand
NTN1	NA	NA	NA	Ligand	Ligand
NTN3	NA	NA	NA	Ligand	Ligand
NTN4	NA	NA	NA	Ligand	Ligand
NTNG1	Receptor	NA	NA	Ligand	NA
NTNG2	Receptor	NA	NA	Ligand	NA
NTRK1	Receptor	Receptor	NA	Receptor	Receptor
NTRK2	Receptor	Receptor	NA	Receptor	Receptor
NTRK3	Receptor	Receptor	NA	Receptor	Receptor
NTS	Ligand	NA	NA	Ligand	Ligand
NTSR1	Receptor	NA	NA	Receptor	Receptor
NTSR2	Receptor	NA	NA	Receptor	Receptor
NXPH1	NA	NA	NA	Ligand	Ligand
NXPH2	NA	NA	NA	Ligand	Ligand
NXPH3	NA	NA	NA	Ligand	Ligand
OBP2A	NA	NA	NA	Ligand	Ligand
OCLN	NA	NA	NA	Receptor	Receptor
OLAH	NA	NA	NA	Ligand	Ligand
OLFM2	NA	NA	NA	Ligand	Ligand
OMD	NA	Ligand	NA	NA	Ligand
OMG	NA	NA	NA	Receptor	Receptor
OPRD1	Receptor	NA	NA	Receptor	Receptor
OPRK1	Receptor	NA	NA	Receptor	Receptor
OPRL1	Receptor	NA	NA	Receptor	Receptor
OPRM1	Receptor	NA	NA	Receptor	Receptor
OR1E1	NA	NA	NA	Receptor	Receptor
OR1G1	NA	NA	NA	Receptor	Receptor
ORAI2	NA	NA	NA	Receptor	Receptor
ORM1	NA	NA	NA	Ligand	Ligand
OSM	Ligand	Ligand	Ligand	Ligand	Ligand
OSMR	Receptor	NA	Receptor	Receptor	Receptor
OSTN	Ligand	NA	Ligand	Ligand	Ligand
OXT	Ligand	NA	NA	Ligand	Ligand
OXTR	Receptor	NA	NA	Receptor	Receptor
P2RX7	NA	NA	NA	Receptor	Receptor
P2RY12	NA	NA	NA	Receptor	Receptor
P2RY14	NA	NA	NA	Receptor	Receptor
P4HB	NA	NA	NA	Ligand	Ligand
PAPLN	NA	NA	NA	Ligand	Ligand
PARD3	Receptor	NA	NA	NA	Receptor
PCSK9	NA	NA	NA	Ligand	Ligand
PDAP1	NA	NA	NA	Ligand	Ligand
PDCD1	Receptor	Receptor	Receptor	NA	Receptor
PDCD1LG2	Ligand	NA	Ligand	NA	Ligand
PDGFA	Ligand	Ligand	Ligand	Ligand	Ligand
PDGFB	Ligand	Ligand	Ligand	Ligand	Ligand
PDGFC	Ligand	Ligand	Ligand	Ligand	Ligand
PDGFD	Ligand	Ligand	NA	Ligand	Ligand
PDGFRA	Receptor	Receptor	Receptor	NA	Receptor
PDGFRB	Receptor	Receptor	Receptor	Receptor	Receptor
PDPN	NA	NA	Receptor	NA	Receptor
PDYN	Ligand	NA	NA	Ligand	Ligand
PECAM1	NA	Receptor	NA	Receptor	Receptor
PENK	Ligand	NA	NA	Ligand	Ligand
PF4	Ligand	Ligand	Ligand	Ligand	Ligand
PF4V1	Ligand	NA	Ligand	NA	Ligand
PGF	Ligand	Ligand	Ligand	Ligand	Ligand
PGRMC1	NA	NA	NA	Receptor	Receptor
PHEX	NA	NA	NA	Receptor	Receptor
PI3	NA	NA	NA	Ligand	Ligand
PILRA	Receptor	NA	NA	NA	Receptor
PIP	NA	NA	NA	Ligand	Ligand
PITPNM3	NA	NA	Receptor	NA	Receptor
PKM	NA	NA	NA	Ligand	Ligand
PLA2G10	NA	NA	NA	Ligand	Ligand
PLA2G2A	NA	Ligand	NA	NA	Ligand
PLAT	NA	NA	NA	Ligand	Ligand
PLAU	NA	NA	Ligand	Ligand	Ligand
PLAUR	NA	NA	Receptor	Ligand	NA
PLG	Ligand	Ligand	NA	Ligand	Ligand
PLGRKT	NA	NA	NA	Receptor	Receptor
PLSCR4	NA	NA	NA	Receptor	Receptor
PLTP	NA	NA	NA	Ligand	Ligand
PLXNA1	Receptor	NA	Receptor	Receptor	Receptor
PLXNA2	Receptor	NA	Receptor	Receptor	Receptor
PLXNA3	Receptor	NA	Receptor	Receptor	Receptor
PLXNA4	Receptor	NA	Receptor	Receptor	Receptor
PLXNB1	Receptor	NA	Receptor	NA	Receptor
PLXNB2	Receptor	Receptor	Receptor	Receptor	Receptor
PLXNB3	Receptor	Receptor	Receptor	Receptor	Receptor
PLXNC1	Receptor	Receptor	Receptor	Receptor	Receptor
PLXND1	Receptor	Receptor	Receptor	Receptor	Receptor
PMCH	Ligand	NA	NA	Ligand	Ligand
PNOC	NA	NA	NA	Ligand	Ligand
PODXL	Receptor	NA	NA	Ligand	NA
PODXL2	NA	NA	NA	Receptor	Receptor
POMC	Ligand	NA	NA	Ligand	Ligand
PON2	NA	NA	NA	Ligand	Ligand
POSTN	Ligand	NA	NA	NA	Ligand
PPBP	Ligand	Ligand	Ligand	Ligand	Ligand
PPY	Ligand	NA	NA	Ligand	Ligand
PRL	Ligand	NA	Ligand	Ligand	Ligand
PRLH	Ligand	NA	NA	Ligand	Ligand
PRLHR	Receptor	NA	NA	Receptor	Receptor
PRLR	Receptor	NA	Receptor	NA	Receptor
PRND	NA	NA	NA	Ligand	Ligand
PROC	NA	NA	NA	Ligand	Ligand
PROCR	NA	NA	NA	Receptor	Receptor
PROK1	Ligand	NA	NA	Ligand	Ligand
PROK2	Ligand	NA	NA	Ligand	Ligand
PROKR1	Receptor	NA	NA	Receptor	Receptor
PROKR2	Receptor	NA	NA	Receptor	Receptor
PROS1	Ligand	NA	NA	Ligand	Ligand
PRSS1	Ligand	NA	NA	NA	Ligand
PRSS23	NA	NA	NA	Ligand	Ligand
PRSS3	Ligand	NA	NA	NA	Ligand
PSAP	Ligand	NA	NA	Ligand	Ligand
PSEN1	NA	NA	NA	Receptor	Receptor
PSPN	Ligand	Ligand	NA	Ligand	Ligand
PTCH1	Receptor	NA	Receptor	Receptor	Receptor
PTCH2	Receptor	NA	Receptor	Receptor	Receptor
PTGDR	NA	NA	NA	Receptor	Receptor
PTGDR2	NA	NA	NA	Receptor	Receptor
PTGIR	NA	NA	NA	Receptor	Receptor
PTH	Ligand	NA	NA	Ligand	Ligand
PTH1R	Receptor	NA	NA	Receptor	Receptor
PTH2	Ligand	NA	NA	Ligand	Ligand
PTH2R	Receptor	NA	NA	Receptor	Receptor
PTHLH	Ligand	NA	NA	Ligand	Ligand
PTN	Ligand	Ligand	NA	Ligand	Ligand
PTPRA	NA	NA	NA	Receptor	Receptor
PTPRB	NA	NA	NA	Receptor	Receptor
PTPRD	NA	NA	NA	Receptor	Receptor
PTPRF	Receptor	NA	NA	NA	Receptor
PTPRG	NA	NA	NA	Receptor	Receptor
PTPRM	NA	NA	NA	Receptor	Receptor
PTPRS	NA	NA	NA	Receptor	Receptor
PTPRU	NA	NA	NA	Receptor	Receptor
PTPRZ1	Receptor	Ligand	NA	Receptor	Receptor
PVR	NA	NA	Ligand	NA	Ligand
PVRIG	NA	NA	Receptor	NA	Receptor
PYY	Ligand	NA	NA	Ligand	Ligand
QDPR	NA	NA	NA	Ligand	Ligand
QRFP	Ligand	NA	NA	Ligand	Ligand
QRFPR	Receptor	NA	NA	Receptor	Receptor
RAET1E	Ligand	Ligand	NA	Ligand	Ligand
RAET1G	Ligand	Ligand	NA	NA	Ligand
RAMP1	NA	NA	Receptor	Receptor	Receptor
RAMP2	NA	NA	Receptor	Receptor	Receptor
RAMP3	NA	NA	Receptor	Receptor	Receptor
RARRES2	Ligand	NA	NA	Ligand	Ligand
RBP3	NA	NA	NA	Ligand	Ligand
RBP4	NA	NA	NA	Ligand	Ligand
RELN	Ligand	NA	NA	Ligand	Ligand
REN	NA	NA	NA	Ligand	Ligand
RET	Receptor	NA	Receptor	Receptor	Receptor
RETN	Ligand	NA	NA	NA	Ligand
RGMA	NA	NA	NA	Ligand	Ligand
RGMB	NA	NA	NA	Ligand	Ligand
RHAG	NA	NA	NA	Receptor	Receptor
RHBDL2	NA	NA	NA	Receptor	Receptor
RIMS1	NA	NA	NA	Ligand	Ligand
RIMS2	NA	NA	NA	Ligand	Ligand
RLN1	Ligand	NA	NA	Ligand	Ligand
RLN2	NA	NA	NA	Ligand	Ligand
RLN3	Ligand	NA	NA	Ligand	Ligand
RNASE2	NA	NA	NA	Ligand	Ligand
ROBO1	NA	NA	Receptor	Receptor	Receptor
ROBO2	NA	NA	Receptor	Receptor	Receptor
ROBO4	NA	NA	NA	Receptor	Receptor
ROR1	NA	NA	NA	Receptor	Receptor
ROR2	NA	NA	NA	Receptor	Receptor
RPH3A	NA	NA	NA	Ligand	Ligand
RSPO1	NA	NA	NA	Ligand	Ligand
RSPO2	NA	NA	NA	Ligand	Ligand
RSPO3	NA	NA	NA	Ligand	Ligand
RSPO4	NA	NA	Ligand	Ligand	Ligand
RTN4	NA	NA	NA	Receptor	Receptor
RTN4R	NA	NA	NA	Receptor	Receptor
RTN4RL1	NA	NA	NA	Receptor	Receptor
RXFP1	Receptor	NA	NA	Receptor	Receptor
RXFP2	Receptor	NA	NA	Receptor	Receptor
RXFP3	Receptor	NA	NA	Receptor	Receptor
RXFP4	Receptor	NA	NA	Receptor	Receptor
S100A8	NA	NA	NA	Ligand	Ligand
S100A9	NA	NA	NA	Ligand	Ligand
S1PR1	NA	NA	NA	Receptor	Receptor
S1PR4	NA	NA	NA	Receptor	Receptor
S1PR5	NA	NA	NA	Receptor	Receptor
SAA1	Ligand	NA	Ligand	Ligand	Ligand
SCGB1A1	NA	NA	NA	Ligand	Ligand
SCGB3A1	NA	NA	NA	Ligand	Ligand
SCGB3A2	Ligand	NA	NA	Ligand	Ligand
SCN5A	NA	NA	NA	Receptor	Receptor
SCN8A	NA	NA	NA	Receptor	Receptor
SCT	Ligand	NA	NA	Ligand	Ligand
SCTR	Receptor	NA	NA	Receptor	Receptor
SDC1	Receptor	NA	NA	NA	Receptor
SDC2	Receptor	NA	NA	Receptor	Receptor
SDC3	Receptor	NA	NA	Receptor	Receptor
SDC4	Receptor	NA	NA	NA	Receptor
SELL	NA	NA	NA	Ligand	Ligand
SELP	Receptor	NA	NA	Receptor	Receptor
SELPLG	Ligand	Receptor	NA	Receptor	Receptor
SEMA3A	Ligand	Ligand	Ligand	Ligand	Ligand
SEMA3B	Ligand	NA	NA	Ligand	Ligand
SEMA3C	Ligand	Ligand	Ligand	Ligand	Ligand
SEMA3D	Ligand	NA	NA	Ligand	Ligand
SEMA3E	Ligand	Ligand	NA	Ligand	Ligand
SEMA3F	Ligand	Ligand	Ligand	NA	Ligand
SEMA3G	Ligand	NA	NA	Ligand	Ligand
SEMA4A	Ligand	NA	Ligand	Receptor	Ligand
SEMA4B	NA	NA	NA	Receptor	Receptor
SEMA4C	Ligand	Receptor	Ligand	Receptor	NA
SEMA4D	Ligand	Receptor	Ligand	NA	Ligand
SEMA4F	NA	NA	NA	Receptor	Receptor
SEMA4G	Ligand	NA	NA	Receptor	NA
SEMA5A	Ligand	NA	NA	Receptor	NA
SEMA5B	Ligand	NA	NA	NA	Ligand
SEMA6A	Ligand	NA	NA	Receptor	NA
SEMA6B	Ligand	NA	NA	NA	Ligand
SEMA6D	Ligand	NA	NA	NA	Ligand
SEMA7A	Ligand	NA	Ligand	NA	Ligand
SERPINA1	NA	NA	NA	Ligand	Ligand
SERPINA7	NA	NA	NA	Ligand	Ligand
SERPINC1	NA	NA	NA	Ligand	Ligand
SERPINE1	NA	NA	NA	Ligand	Ligand
SERPINE2	NA	NA	NA	Ligand	Ligand
SERPING1	NA	NA	NA	Ligand	Ligand
SFRP1	NA	NA	NA	Ligand	Ligand
SFTPA1	NA	NA	NA	Ligand	Ligand
SFTPA2	NA	NA	NA	Ligand	Ligand
SFTPD	NA	NA	NA	Ligand	Ligand
SHBG	NA	NA	NA	Ligand	Ligand
SHH	Ligand	NA	Ligand	Ligand	Ligand
SIGIRR	NA	NA	Receptor	NA	Receptor
SIGLEC1	Ligand	Ligand	NA	NA	Ligand
SIGLEC10	NA	Ligand	Receptor	NA	NA
SIGLEC9	NA	NA	Ligand	NA	Ligand
SIRPA	NA	Receptor	Receptor	Receptor	Receptor
SIRPB1	NA	NA	NA	Receptor	Receptor
SIRPG	NA	NA	Receptor	Receptor	Receptor
SLC16A2	NA	NA	NA	Receptor	Receptor
SLC16A4	NA	NA	NA	Receptor	Receptor
SLC17A7	NA	NA	NA	Receptor	Receptor
SLC18A2	NA	NA	NA	Receptor	Receptor
SLC18A3	NA	NA	NA	Receptor	Receptor
SLC37A1	NA	NA	NA	Receptor	Receptor
SLC40A1	NA	NA	NA	Receptor	Receptor
SLC44A5	NA	NA	NA	Receptor	Receptor
SLC45A3	NA	NA	NA	Receptor	Receptor
SLC5A11	NA	NA	NA	Receptor	Receptor
SLC9C2	NA	NA	NA	Receptor	Receptor
SLIT1	NA	NA	Ligand	Ligand	Ligand
SLIT2	NA	NA	NA	Ligand	Ligand
SLIT3	NA	NA	NA	Ligand	Ligand
SLPI	NA	NA	NA	Ligand	Ligand
SLURP1	Ligand	NA	NA	NA	Ligand
SMO	Receptor	NA	NA	Receptor	Receptor
SORBS1	NA	NA	NA	Ligand	Ligand
SORCS3	NA	NA	NA	Receptor	Receptor
SORL1	NA	NA	NA	Receptor	Receptor
SORT1	Receptor	NA	NA	Receptor	Receptor
SOST	NA	NA	NA	Ligand	Ligand
SPINK1	NA	NA	NA	Ligand	Ligand
SPINT1	NA	NA	NA	Ligand	Ligand
SPN	Receptor	NA	NA	NA	Receptor
SPON2	NA	NA	NA	Ligand	Ligand
SPP1	Ligand	Ligand	Ligand	Ligand	Ligand
SST	Ligand	NA	NA	Ligand	Ligand
SSTR1	Receptor	NA	NA	Receptor	Receptor
SSTR2	Receptor	NA	NA	Receptor	Receptor
SSTR3	Receptor	NA	NA	Receptor	Receptor
SSTR4	Receptor	NA	NA	Receptor	Receptor
SSTR5	Receptor	NA	NA	Receptor	Receptor
ST14	NA	NA	NA	Receptor	Receptor
STRA6	NA	NA	NA	Receptor	Receptor
STX1A	NA	NA	Receptor	NA	Receptor
STX3	NA	NA	Receptor	NA	Receptor
STX4	NA	NA	Receptor	NA	Receptor
SV2A	Receptor	NA	NA	NA	Receptor
SV2B	Receptor	NA	NA	NA	Receptor
SV2C	Receptor	NA	NA	NA	Receptor
SYTL3	NA	NA	NA	Ligand	Ligand
TAC1	Ligand	NA	NA	Ligand	Ligand
TAC3	Ligand	NA	NA	Ligand	Ligand
TAC4	Ligand	NA	NA	Ligand	Ligand
TACR1	Receptor	NA	NA	Receptor	Receptor
TACR2	Receptor	NA	NA	Receptor	Receptor
TACR3	Receptor	NA	NA	Receptor	Receptor
TBXA2R	NA	NA	NA	Receptor	Receptor
TCN2	NA	NA	NA	Ligand	Ligand
TCTN1	NA	NA	NA	Ligand	Ligand
TDGF1	NA	NA	NA	Ligand	Ligand
TEK	Receptor	NA	NA	NA	Receptor
TF	NA	NA	NA	Ligand	Ligand
TFPI	NA	NA	NA	Ligand	Ligand
TFR2	NA	NA	NA	Receptor	Receptor
TG	NA	NA	NA	Ligand	Ligand
TGFA	Ligand	Ligand	Ligand	NA	Ligand
TGFB1	Ligand	Ligand	Ligand	Ligand	Ligand
TGFB2	Ligand	Ligand	Ligand	Ligand	Ligand
TGFB3	Ligand	Ligand	Ligand	Ligand	Ligand
TGFBR1	Receptor	NA	Receptor	Receptor	Receptor
TGFBR2	Receptor	NA	Receptor	NA	Receptor
TGM2	NA	NA	NA	Ligand	Ligand
THBS1	Ligand	NA	NA	Ligand	Ligand
THBS2	Ligand	NA	NA	Ligand	Ligand
THBS3	Ligand	NA	NA	NA	Ligand
THBS4	Ligand	NA	NA	NA	Ligand
THPO	Ligand	Ligand	Ligand	Ligand	Ligand
THY1	Ligand	NA	NA	NA	Ligand
TIE1	NA	NA	NA	Receptor	Receptor
TIGIT	NA	NA	Receptor	NA	Receptor
TIMP1	NA	NA	NA	Ligand	Ligand
TIMP2	NA	NA	NA	Ligand	Ligand
TIMP3	NA	NA	NA	Ligand	Ligand
TLR1	NA	NA	NA	Receptor	Receptor
TLR2	NA	NA	NA	Receptor	Receptor
TLR4	Receptor	NA	NA	Receptor	Receptor
TLR5	NA	NA	NA	Receptor	Receptor
TLR6	NA	NA	NA	Receptor	Receptor
TMEM222	NA	NA	NA	Receptor	Receptor
TMEM67	NA	NA	NA	Receptor	Receptor
TMIGD2	NA	NA	Receptor	NA	Receptor
TMPRSS6	NA	NA	NA	Receptor	Receptor
TNC	Ligand	Ligand	NA	Ligand	Ligand
TNF	Ligand	Ligand	Ligand	NA	Ligand
TNFRSF10A	Receptor	Receptor	Receptor	Ligand	Receptor
TNFRSF10B	NA	Receptor	Receptor	Receptor	Receptor
TNFRSF10C	NA	Receptor	Receptor	Receptor	Receptor
TNFRSF10D	NA	Receptor	Receptor	Receptor	Receptor
TNFRSF11A	Receptor	Receptor	Receptor	NA	Receptor
TNFRSF11B	Receptor	Ligand	Receptor	Ligand	NA
TNFRSF12A	Receptor	Receptor	Receptor	Receptor	Receptor
TNFRSF13B	Receptor	Receptor	Receptor	Receptor	Receptor
TNFRSF13C	Receptor	NA	Receptor	Receptor	Receptor
TNFRSF14	Receptor	Receptor	Receptor	Receptor	Receptor
TNFRSF17	Receptor	Receptor	Receptor	Receptor	Receptor
TNFRSF18	Receptor	NA	Receptor	NA	Receptor
TNFRSF19	NA	NA	NA	Receptor	Receptor
TNFRSF1A	Receptor	NA	Receptor	NA	Receptor
TNFRSF1B	Receptor	NA	Receptor	NA	Receptor
TNFRSF21	NA	NA	NA	Receptor	Receptor
TNFRSF25	Receptor	NA	Receptor	NA	Receptor
TNFRSF4	Receptor	Receptor	Receptor	Receptor	Receptor
TNFRSF6B	NA	Ligand	Receptor	Ligand	Ligand
TNFRSF8	Receptor	Receptor	Receptor	NA	Receptor
TNFRSF9	Receptor	Receptor	Receptor	NA	Receptor
TNFSF10	Ligand	Ligand	Ligand	Receptor	Ligand
TNFSF11	Ligand	NA	Ligand	NA	Ligand
TNFSF12	Ligand	Ligand	Ligand	NA	Ligand
TNFSF13	Ligand	Ligand	Ligand	NA	Ligand
TNFSF13B	Ligand	Ligand	Ligand	NA	Ligand
TNFSF14	Ligand	Ligand	Ligand	NA	Ligand
TNFSF15	Ligand	Ligand	Ligand	NA	Ligand
TNFSF18	Ligand	Ligand	Ligand	Receptor	Ligand
TNFSF4	Ligand	NA	Ligand	Receptor	Ligand
TNFSF8	Ligand	NA	Ligand	Receptor	Ligand
TNFSF9	Ligand	Ligand	Ligand	Receptor	Ligand
TNN	Ligand	NA	NA	NA	Ligand
TNR	Ligand	NA	NA	NA	Ligand
TNXB	Ligand	NA	NA	NA	Ligand
TREM2	Receptor	NA	NA	Receptor	Receptor
TRH	Ligand	NA	NA	Ligand	Ligand
TRHR	Receptor	NA	NA	Receptor	Receptor
TSHB	Ligand	NA	NA	Ligand	Ligand
TSHR	Receptor	NA	NA	Receptor	Receptor
TSLP	Ligand	Ligand	Ligand	Ligand	Ligand
TSPAN1	NA	NA	NA	Receptor	Receptor
TXLNA	NA	NA	Ligand	NA	Ligand
TYRO3	Receptor	NA	NA	Receptor	Receptor
TYROBP	NA	NA	NA	Receptor	Receptor
UCN	Ligand	NA	NA	Ligand	Ligand
UCN2	Ligand	NA	NA	Ligand	Ligand
UCN3	Ligand	NA	NA	Ligand	Ligand
ULBP1	Ligand	Receptor	NA	NA	NA
ULBP2	NA	Ligand	NA	NA	Ligand
UNC5A	NA	NA	NA	Receptor	Receptor
UNC5B	NA	NA	NA	Receptor	Receptor
UNC5C	NA	NA	NA	Receptor	Receptor
UNC5D	NA	NA	NA	Receptor	Receptor
UTS2	Ligand	NA	NA	Ligand	Ligand
UTS2B	Ligand	NA	NA	Ligand	Ligand
UTS2R	Receptor	NA	NA	Receptor	Receptor
VANGL1	NA	NA	NA	Receptor	Receptor
VASP	NA	NA	NA	Ligand	Ligand
VCAM1	Receptor	NA	Ligand	Ligand	Ligand
VCAN	NA	NA	Ligand	Ligand	Ligand
VEGFA	Ligand	Ligand	Ligand	Ligand	Ligand
VEGFB	Ligand	Ligand	Ligand	Ligand	Ligand
VEGFC	Ligand	Ligand	Ligand	Ligand	Ligand
VIM	NA	NA	NA	Ligand	Ligand
VIP	Ligand	NA	NA	Ligand	Ligand
VIPR1	Receptor	NA	NA	Receptor	Receptor
VIPR2	Receptor	NA	NA	Receptor	Receptor
VTCN1	NA	NA	Receptor	Receptor	Receptor
VTN	Ligand	Ligand	Ligand	Ligand	Ligand
VWF	Ligand	Ligand	NA	Ligand	Ligand
WNT1	Ligand	Ligand	NA	Ligand	Ligand
WNT10A	Ligand	NA	NA	NA	Ligand
WNT10B	Ligand	NA	NA	NA	Ligand
WNT11	Ligand	NA	NA	Ligand	Ligand
WNT16	Ligand	NA	NA	Ligand	Ligand
WNT2	Ligand	Ligand	NA	Ligand	Ligand
WNT2B	Ligand	Ligand	NA	NA	Ligand
WNT3	Ligand	Ligand	NA	Ligand	Ligand
WNT3A	Ligand	NA	NA	Ligand	Ligand
WNT4	Ligand	Ligand	NA	Ligand	Ligand
WNT5A	Ligand	Ligand	Ligand	Ligand	Ligand
WNT5B	Ligand	NA	Ligand	NA	Ligand
WNT6	Ligand	NA	NA	NA	Ligand
WNT7A	Ligand	Ligand	NA	Ligand	Ligand
WNT7B	Ligand	Ligand	NA	Ligand	Ligand
WNT8A	Ligand	NA	NA	NA	Ligand
WNT8B	Ligand	NA	NA	NA	Ligand
WNT9A	Ligand	NA	NA	NA	Ligand
WNT9B	Ligand	NA	NA	NA	Ligand
XCL1	Ligand	Ligand	Ligand	Ligand	Ligand
XCL2	Ligand	Ligand	Ligand	Ligand	Ligand
XCR1	Receptor	Receptor	Receptor	Receptor	Receptor
ZG16B	NA	NA	NA	Ligand	Ligand
ZNRF3	NA	NA	NA	Receptor	Receptor
